# Supplementary material
Source: PubMed Central journal article supplement (PMC6143013)
Supplement: jamaoncol-4-1245-s001.pdf [file jamaoncol-4-1245-s001.pdf]

## Supplementary Online Content

Kharfan-Dabaja MA, Labopin M, Polge E, et al. Association of second allogeneic hematopoietic cell transplant vs donor lymphocyte infusion with overall survival in patients with acute myeloid leukemia relapse. *JAMA Oncol*. Published online July 12, 2018. doi:10.1001/jamaoncol.2018.2091

**eTable 1.** Patient, Disease and Treatment Related Characteristics at Time of Allo-HCT1 (All Population on Intent-to Receive First Intervention)

**eTable 2.** Causes of Non-Relapse Deaths (DLI vs. Allo-HCT2)

**eTable 3.** Multivariate Analysis for NRM and OS (All Patients)

**eTable 4.** Multivariate Analysis for RI, LFS, NRM and OS (Only Patients in CR)

**eTable 5.** Patient-, Disease-, and Treatment-Related Characteristics of Patients Who Received Only Allo-HCT2 or DLI

**eTable 6.** Treatment Outcomes for Patients Who Received Only Allo-HCT2 or DLI

**eTable 7.** Causes of Non-Relapse Deaths (DLI vs. Allo-HCT2) for Patients Who Received Only Allo-HCT2 or DLI

**eTable 8.** Multivariate Analysis for NRM and OS (All Patients) Who Received Only Allo-HCT2 or DLI

**eFigure 1.** OS (Allo-HCT2 vs. DLI), Patients in CR at Time of Intervention

**eFigure 2.** LFS (Allo-HCT2 vs. DLI), Patients in CR at Time of Intervention

This supplementary material has been provided by the authors to give readers additional information about their work.

**eTable 1.** Patient, Disease and Treatment Related Characteristics at Time of Allo-HCT1 (All Population on Intent-to Receive First Intervention)

| <b>Variables</b>                                                       | <b>DLI<br/>(n=281)<br/>DLI only=230<br/>DLI+allo-HCT2=51</b> | <b>Allo-HCT2<br/>(n=137)<br/>Allo-HCT2 only=135<br/>Allo-HCT2+DLI=2</b> | <b>p-value</b> |
|------------------------------------------------------------------------|--------------------------------------------------------------|-------------------------------------------------------------------------|----------------|
| <b>Median age (range),<br/>years, at intervention</b>                  | 48 (18-73)<br>IQR=37-57                                      | 43 (18-67)<br>IQR=32-52                                                 | <b>0.001</b>   |
| Recipient gender<br>Female<br>Male                                     | 128 (46%)<br>153 (54%)                                       | 62 (45%)<br>75 (55%)                                                    | 0.95           |
| Donor gender<br>Female<br>Male<br>Missing/unknown                      | 88 (31%)<br>192 (69%)<br>1                                   | 42 (31%)<br>95 (69%)<br>0                                               | 0.87           |
| Donor→recipient<br>gender matching<br>F→M<br>Others<br>Missing/unknown | 44 (16%)<br>236 (84%)<br>1                                   | 26 (19%)<br>111 (81%)                                                   | 0.40           |
| AML<br><i>de novo</i><br>Secondary                                     | 245 (87%)<br>36 (13%)                                        | 114 (83%)<br>23 (17%)                                                   | 0.27           |
| Cytogenetic risk<br>Good<br>Intermediate<br>Poor<br>Unknown/failed     | 25 (9%)<br>153 (54%)<br>77 (27%)<br>26 (9%)                  | 8 (6%)<br>88 (64%)<br>32 (23%)<br>9 (7%)                                | 0.26           |

|                                                                        |                                 |                             |              |
|------------------------------------------------------------------------|---------------------------------|-----------------------------|--------------|
|                                                                        |                                 |                             |              |
| <b>Remission status at time of allo-HCT1</b><br>CR1<br>CR2<br>CR3      | 218 (78%)<br>56 (20%)<br>7 (2%) | 119 (87%)<br>18 (13%)<br>0  | <b>0.03</b>  |
| <b>Median (range), year of allo-HCT1</b>                               | 2007 (1992-2014)                | 2006 (1996-2014)            | <b>0.03</b>  |
| <b>Regimen used for allo-HCT1</b><br>MAC<br>RIC<br>Missing/unknown     | 154 (55%)<br>126 (45%)<br>1     | 92 (67%)<br>45 (33%)<br>0   | <b>0.02</b>  |
| Donor source<br>MRD<br>URD                                             | 149 (53%)<br>132 (47%)*         | 85 (62%)<br>52 (38%)**      | 0.08         |
| Cell source<br>BM<br>PBSC                                              | 51 (18%)<br>230 (82%)           | 31 (23%)<br>106 (77%)       | 0.28         |
| <b><i>In vivo</i> T-cell depletion</b><br>Yes<br>No<br>Missing/unknown | 158 (57%)^<br>120 (43%)<br>3    | 57 (43%)^^<br>77 (57%)<br>3 | <b>0.006</b> |

|                      |           |          |       |
|----------------------|-----------|----------|-------|
| Patient CMV serology |           |          | 0.053 |
| Positive             | 181 (65%) | 74 (55%) |       |
| Negative             | 97 (35%)  | 60 (45%) |       |
| Missing/unknown      | 3         | 3        |       |
| Donor CMV serology   |           |          | 0.26  |
| Positive             | 131 (48%) | 72 (54%) |       |
| Negative             | 143 (52%) | 62 (46%) |       |
| Missing/unknown      | 7         | 3        |       |

***Bold denotes significant difference***

**Abbreviations:** DLI, donor lymphocyte infusion; allo-HCT2, second allogeneic hematopoietic cell transplant; IQR, interquartile range; F, female; M, male; CR1, first complete remission; CR2, second complete remission; CR3, third complete remission; allo-HCT1, first allogeneic hematopoietic cell transplant; MAC, myeloablative conditioning regimen; RIC, reduced intensity conditioning regimen; MRD, HLA-matched related donor; URD, unrelated donor; BM, bone marrow cells; PBSC, peripheral blood stem cells; CMV, cytomegalovirus

\*HLA-matched unrelated: 8/8 (n=4), 10/10 (n=65); HLA-mismatched unrelated: 7/8 (n=3), 9/10 (n=30), 8/10 (n=3), <7/82 (n=2), ≤ 5/6 (n=12), unknown/missing (n=13)

\*\* HLA-matched unrelated: 8/8 (n=2), 10/10 (n=29); HLA-mismatched unrelated: 9/10 (n=6), 8/10 (n=3), ≤ 5/6 (n=3), unknown/missing (n=9)

^antithymocyte globulin (n=132), alemtuzumab (n=26)

^^ antithymocyte globulin (n=50), alemtuzumab (n=7)

**eTable 2.** Causes Of Non-Relapse Deaths (DLI vs. Allo-HCT2)

| <b>Causes of non-relapse deaths</b> | <b>DLI<br/>(n=52)</b> | <b>Allo-HCT2<br/>(n=50)</b> |
|-------------------------------------|-----------------------|-----------------------------|
| Infection                           | 21                    | 22                          |
| GVHD                                | 17                    | 18                          |
| Hepatic SOS/VOD                     | 0                     | 4                           |
| Hemorrhage                          | 4                     | 1                           |
| Cardiac                             | 0                     | 1                           |
| Idiopathic pulmonary syndrome       | 2                     | 0                           |
| Secondary malignancies              | 3                     | 1                           |
| Other transplant related            | 10*                   | 4**                         |

**Abbreviations:** GVHD, graft-versus-host disease; SOS/VOD, sinusoidal obstructive syndrome/veno-occlusive disease

\*Euthanasia (n=1), terminal cachexia with secondary multiorgan failure (n=1), transplant-related but exact cause unknown (n=8)

\*\* Transplant-related but exact cause unknown (n=4)

**eTable 3.** Multivariate Analysis for NRM and OS (All Patients)

| Variables                                          | NRM (all patients)                |                   | OS (all patients)                 |                   |
|----------------------------------------------------|-----------------------------------|-------------------|-----------------------------------|-------------------|
|                                                    | HR<br>(95%CI)                     | p-value           | HR<br>(95%CI)                     | p-value           |
| Allo-HCT2 vs. DLI                                  | <b>4.06</b><br><b>(2.32-7.08)</b> | <b>&lt;0.0001</b> | 1.23<br>(0.95-1.60)               | 0.12              |
| Age at intervention (per 10 years)                 | 1.20<br>(0.96-1.51)               | 0.11              | 1.05<br>(0.95-1.15)               | 0.36              |
| Poor risk cytogenetics vs. others                  | 1.33<br>(0.73-2.42)               | 0.35              | <b>1.42</b><br><b>(1.10-1.84)</b> | <b>0.008</b>      |
| Secondary vs. <i>de novo</i> AML                   | 0.75<br>(0.34-1.63)               | 0.46              | 1.17<br>(0.85-1.61)               | 0.34              |
| Year of allo-HCT1                                  | 1.01<br>(0.94-1.09)               | 0.78              | 0.99<br>(0.96-1.02)               | 0.48              |
| CR1 at time of allo-HCT1                           | 0.73<br>(0.37-1.42)               | 0.35              | 0.95<br>(0.70-1.28)               | 0.73              |
| URD vs. MRD at allo-HCT1                           | 1.00<br>(0.28-3.56)               | 1.0               | 0.80<br>(0.44-1.45)               | 0.46              |
| RIC vs. MAC at allo-HCT1                           | 0.94<br>(0.52-1.71)               | 0.84              | 1.25<br>(0.96-1.63)               | 0.09              |
| Grade 2-4 vs. none aGVHD prior to DLI/allo-HCT2    | <b>2.18</b><br><b>(1.14-4.17)</b> | <b>0.02</b>       | <b>1.62</b><br><b>(1.15-2.29)</b> | <b>0.006</b>      |
| cGVHD (all grades) vs. none prior to DLI/allo-HCT2 | 1.04<br>(0.59-1.83)               | 0.90              | <b>0.71</b><br><b>(0.53-0.95)</b> | <b>0.02</b>       |
| Time from allo-HCT1 to relapse (months)            | 0.99<br>(0.98-1.00)               | 0.15              | <b>0.99</b><br><b>(0.98-0.99)</b> | <b>0.0003</b>     |
| Time from relapse to DLI/allo-HCT2 (months)        | 0.98<br>(0.85-1.13)               | 0.81              | 0.97<br>(0.91-1.04)               | 0.42              |
| Other donor vs. MRD                                | 1.27<br>(0.37-4.37)               | 0.71              | 1.32<br>(0.74-2.36)               | 0.34              |
| CR vs. no CR at DLI/allo-HCT2                      | 0.91<br>(0.50-1.67)               | 0.76              | <b>0.55</b><br><b>(0.41-0.74)</b> | <b>&lt;0.0001</b> |

**Bold denotes significant difference**

**Abbreviations:** NRM, non-relapse mortality; OS, overall survival; allo-HCT2, second allogeneic hematopoietic cell transplant; DLI, donor lymphocyte infusion; allo-HCT1, first allogeneic hematopoietic cell transplant; CR1, first complete remission; MRD, HLA-matched related donor; URD, unrelated donor; MAC, myeloablative conditioning regimen; RIC, reduced intensity conditioning regimen; aGVHD, acute graft-versus-host disease; cGVHD, chronic GVHD

**eTable 4.** Multivariate Analysis for RI, LFS, NRM and OS (Only Patients in CR)

| Variables                                                | RI                  |         | LFS                 |         | NRM                                |             | OS                                |             |
|----------------------------------------------------------|---------------------|---------|---------------------|---------|------------------------------------|-------------|-----------------------------------|-------------|
|                                                          | HR (95%CI)          | p-value | HR (95%CI)          | p-value | HR (95%CI)                         | p-value     | HR (95%CI)                        | p-value     |
| Allo-HCT2 vs. DLI                                        | 1.21<br>(0.63-2.31) | 0.56    | 1.52<br>(0.88-2.63) | 0.14    | 2.93<br>(0.96-8.88)                | 0.06        | 1.55<br>(0.89-2.71)               | 0.12        |
| Age at intervention<br>(per 10 years)                    | 0.90<br>(0.73-1.12) | 0.35    | 0.92<br>(0.77-1.11) | 0.39    | 0.99<br>(0.66-1.46)                | 0.94        | 0.95<br>(0.77-1.16)               | 0.59        |
| Year of allo-HCT1                                        | 1.01<br>(0.93-1.09) | 0.80    | 1.04<br>(0.97-1.11) | 0.25    | 1.12<br>(0.97-1.29)                | 0.12        | 1.05<br>(0.98-1.13)               | 0.18        |
| Grade 2-4 vs. none<br>aGVHD prior to<br>DLI/allo-HCT2    | 1.36<br>(0.59-3.14) | 0.47    | 1.82<br>(0.95-3.48) | 0.07    | <b>3.75</b><br><b>(1.23-11.41)</b> | <b>0.02</b> | <b>2.42</b><br><b>(1.22-4.77)</b> | <b>0.01</b> |
| cGVHD (all grades)<br>vs. none prior to<br>DLI/allo-HCT2 | 0.91<br>(0.46-1.80) | 0.79    | 0.97<br>(0.55-1.70) | 0.90    | 1.18<br>(0.42-3.36)                | 0.76        | 0.97<br>(0.53-1.77)               | 0.93        |
| Time from allo-HCT1<br>to relapse (months)               | 1.00<br>(0.98-1.01) | 0.56    | 1.00<br>(0.99-1.01) | 0.85    | 1.01<br>(0.98-1.03)                | 0.71        | 1.00<br>(0.99-1.01)               | 0.98        |
| Time from relapse to<br>DLI/allo-HCT2<br>(months)        | 0.99<br>(0.86-1.13) | 0.84    | 0.95<br>(0.84-1.07) | 0.36    | 0.88<br>(0.69-1.11)                | 0.28        | 0.91<br>(0.80-1.03)               | 0.13        |
| Status at<br>intervention<br>CR3 vs. CR2                 | 1.67<br>(0.79-3.54) | 0.18    | 1.62<br>(0.84-3.13) | 0.15    | 1.38<br>(0.34-5.56)                | 0.65        | 1.23<br>(0.63-2.40)               | 0.55        |
| Poor risk<br>cytogenetics vs.<br>others                  | 1.10<br>(0.52-2.32) | 0.81    | 1.42<br>(0.77-2.60) | 0.26    | 2.40<br>(0.76-7.54)                | 0.13        | 1.64<br>(0.85-3.18)               | 0.14        |
| Other donor vs.<br>MRD                                   | 1.02<br>(0.54-1.91) | 0.96    | 1.40<br>(0.83-2.36) | 0.21    | <b>3.51</b><br><b>(1.26-9.80)</b>  | <b>0.02</b> | <b>1.84</b><br><b>(1.07-3.17)</b> | <b>0.03</b> |

**Bold denotes significant difference**

**Abbreviations:** RI, relapse incidence; LFS, leukemia-free survival; NRM, non-relapse mortality; OS, overall survival; allo-HCT2, second allogeneic hematopoietic cell transplant; DLI, donor lymphocyte infusion; allo-HCT1, first allogeneic hematopoietic cell transplant; aGVHD, acute graft-versus-host disease; cGVHD, chronic GVHD; CR2, second complete remission; CR3, third complete remission; MRD, HLA-matched related donor

**eTable 5.** Patient-, Disease-, and Treatment-Related Characteristics of Patients Who Received Only Allo-HCT2 or DLI

| <b>Variables</b>                                          | <b>DLI<br/>(n=230)</b>          | <b>Allo-HCT2<br/>(n=135)</b>    | <b>p-value</b>    |
|-----------------------------------------------------------|---------------------------------|---------------------------------|-------------------|
| <b>Median age (range),<br/>years, at<br/>intervention</b> | <b>50 (19-75)<br/>IQR=40-60</b> | <b>43 (18-67)<br/>IQR=32-52</b> | <b>&lt;0.0001</b> |
| Recipient gender                                          |                                 |                                 | 0.77              |
| Female                                                    | 102 (44%)                       | 62 (46%)                        |                   |
| Male                                                      | 128 (56%)                       | 73 (54%)                        |                   |
| Donor gender                                              |                                 |                                 | 0.12              |
| Female                                                    | 74 (33%)                        | 51 (38%)                        |                   |
| Male                                                      | 153 (67%)                       | 82 (62%)                        |                   |
| Missing/unknown                                           | 3                               | 2                               |                   |
| <b>Same original donor</b>                                |                                 |                                 | <b>&lt;0.0001</b> |
| <b>Yes</b>                                                | <b>224 (100%)</b>               | <b>72 (60%)</b>                 |                   |
| <b>No</b>                                                 | <b>-</b>                        | <b>49 (41%)</b>                 |                   |
| <b>Missing/unknown</b>                                    | <b>6*</b>                       | <b>14</b>                       |                   |
| <b>Remission status at<br/>intervention</b>               |                                 |                                 | <b>&lt;0.0001</b> |
| <b>CR2</b>                                                | <b>33 (14%)</b>                 | <b>46 (34%)</b>                 |                   |
| <b>CR3</b>                                                | <b>14 (6%)</b>                  | <b>7 (5%)</b>                   |                   |
| <b>Relapsed 1</b>                                         | <b>143 (62%)</b>                | <b>71 (53%)</b>                 |                   |
| <b>Relapsed 2</b>                                         | <b>40 (17%)</b>                 | <b>11 (8%)</b>                  |                   |
| Donor source                                              |                                 |                                 | 0.16              |
| MRD                                                       | 122 (54%)                       | 75 (56%)                        |                   |
| URD                                                       | 105 (46%)                       | 58 (43%)                        |                   |
| Haploidentical                                            | 0                               | 2 (1%)                          |                   |
| Missing/unknown                                           | 3                               | 0                               |                   |



|                                                                                                          |                                      |                                      |                   |
|----------------------------------------------------------------------------------------------------------|--------------------------------------|--------------------------------------|-------------------|
| Cell source<br>BM<br>PBSC<br>BM+PBSC<br>Missing/unknown                                                  | 9 (4%)<br>217 (96%)<br>0<br>4        | 6 (4%)<br>128 (95%)<br>1 (1%)<br>0   | 0.42              |
| <b>Median time (range)<br/>from allo-HCT1 to<br/>relapse, days</b>                                       | <b>193 (20-3872)<br/>IQR=114-482</b> | <b>342 (30-4569)<br/>IQR=132-699</b> | <b>0.005</b>      |
| <b>Median time from<br/>allo-HCT1 relapse to<br/>intervention, days</b>                                  | <b>32 (0-305)<br/>IQR=17-69</b>      | <b>68 (6-311)<br/>IQR=39-119</b>     | <b>&lt;0.0001</b> |
| <b>Grade 2-4 aGVHD<br/>prior to intervention</b><br>Yes<br>No<br>Missing/unknown                         | <b>18 (8%)<br/>212 (92%)<br/>3</b>   | <b>24 (18%)<br/>108 (82%)<br/>3</b>  | <b>0.003</b>      |
| cGVHD (any grade)<br>prior to intervention<br>Yes<br>No<br>Missing/unknown                               | 46 (21%)<br>170 (79%)<br>14          | 32 (25%)<br>96 (75%)<br>7            | 0.43              |
| Cytotoxic therapy<br>including<br>hypomethylating<br>agents prior to DLI<br>Yes<br>No<br>Missing/unknown | 146 (66%)<br>76 (34%)<br>8           | -                                    | -                 |

|                                                                |   |                           |   |
|----------------------------------------------------------------|---|---------------------------|---|
| Regimen used for<br>allo-HCT2<br>MAC<br>RIC<br>Missing/unknown | - | 48 (37%)<br>83 (63%)<br>4 | - |
|----------------------------------------------------------------|---|---------------------------|---|

***Bold denotes significant difference***

**Abbreviations:** DLI, donor lymphocyte infusion; allo-HCT2, second allogeneic hematopoietic cell transplant; IQR, interquartile range; CR2, second complete remission; CR3, third complete remission; MRD, HLA-matched related donor; URD, unrelated donor; BM, bone marrow cells; PBSC, peripheral blood stem cells; allo-HCT1, first allogeneic hematopoietic cell transplant; aGVHD, acute graft-versus-host disease; cGVHD, chronic GVHD; MAC, myeloablative conditioning regimen; RIC, reduced intensity conditioning regimen

\*Although information missing, these are presumably from same donor

**eTable 6.** Treatment Outcomes for Patients Who Received Only Allo-HCT2 or DLI

| Outcomes                                                 | DLI                       | Allo-HCT2                 | P-value           |
|----------------------------------------------------------|---------------------------|---------------------------|-------------------|
| <b>Response</b>                                          |                           |                           | <b>&lt;0.0001</b> |
| CR (before and after) intervention                       | <b>47 (20%)</b>           | <b>53 (39%)</b>           |                   |
| CR (after) intervention                                  | <b>62 (27%)</b>           | <b>52 (39%)</b>           |                   |
| No response                                              | <b>119 (52%)</b>          | <b>21 (16%)</b>           |                   |
| Not available*                                           | <b>2 (1%)</b>             | <b>9 (7%)</b>             |                   |
| OS (all patients)                                        |                           |                           | 0.51              |
| 2-year                                                   | 24% (95%CI=19-30%)        | 26% (95%CI=18-33%)        |                   |
| 5-year                                                   | 14% (95%CI=9-19%)         | 18% (95%CI=11-25%)        |                   |
| <b>NRM (all patients)</b>                                |                           |                           | <b>&lt;0.0001</b> |
| 2-year                                                   | <b>9% (95%CI=6-13%)</b>   | <b>27% (95%CI=20-35%)</b> |                   |
| 5-year                                                   | <b>10% (95%CI=6-14%)</b>  | <b>29% (95%CI=21-37%)</b> |                   |
| <b>Grade 2-4 aGVHD after intervention (all patients)</b> |                           |                           | <b>0.003</b>      |
| 2-year                                                   | <b>22% (95%CI=17-27%)</b> | <b>37% (95%CI=29-46%)</b> |                   |
| 5-year                                                   | <b>22% (95%CI=17-27%)</b> | <b>37% (95%CI=29-46%)</b> |                   |
| Causes of death (all patients)                           |                           |                           | -                 |
| Relapse                                                  | 151 (77%)                 | 62 (55%)                  |                   |
| Non-relapse                                              | 44 (23%)                  | 51 (45%)                  |                   |

**Bold denotes significant difference**

**Abbreviations:** DLI, donor lymphocyte infusion; allo-HCT2, second allogeneic hematopoietic cell transplant; CR, complete remission; OS, overall survival; NRM, non-relapse mortality; aGVHD, acute graft-versus-host disease

**eTable 7.** Causes of Non-Relapse Deaths (DLI vs. Allo-HCT2) for Patients Who Received Only Allo-HCT2 or DLI

| <b>Causes of non-relapse deaths</b> | <b>DLI<br/>(n=44)</b> | <b>Allo-HCT2<br/>(n=51)</b> |
|-------------------------------------|-----------------------|-----------------------------|
| Infection                           | 14                    | 22                          |
| GVHD                                | 16                    | 18                          |
| Hepatic SOS/VOD                     | 0                     | 4                           |
| Hemorrhage                          | 2                     | 1                           |
| Cardiac                             | 0                     | 1                           |
| Idiopathic pulmonary syndrome       | 1                     | 0                           |
| Secondary malignancies              | 3                     | 1                           |
| Other transplant related            | 8                     | 4                           |

**Abbreviations:** GVHD, graft-versus-host disease; SOS/VOD, sinusoidal obstructive syndrome/veno-occlusive disease

**eTable 8.** Multivariate Analysis for NRM and OS (All Patients) Who Received Only Allo-HCT2 or DLI

| Variables                                              | NRM (all patients)         |                   | OS (all patients)          |                   |
|--------------------------------------------------------|----------------------------|-------------------|----------------------------|-------------------|
|                                                        | HR<br>(95%CI)              | p-value           | HR<br>(95%CI)              | p-value           |
| Allo-HCT2 vs. DLI                                      | <b>4.06</b><br>(2.27-7.26) | <b>&lt;0.0001</b> | 1.11<br>(0.84-1.45)        | 0.47              |
| Age at intervention (per 10 years)                     | 1.18<br>(0.94-1.49)        | 0.15              | 1.05<br>(0.95-1.16)        | 0.39              |
| Poor risk cytogenetics vs. others at time of allo-HCT1 | 1.53<br>(0.82-2.83)        | 0.18              | <b>1.43</b><br>(1.08-1.89) | <b>0.01</b>       |
| Secondary vs. <i>de novo</i> AML                       | 0.71<br>(0.31-1.60)        | 0.40              | 1.18<br>(0.85-1.65)        | 0.33              |
| Year of allo-HCT1                                      | 1.01<br>(0.94-1.09)        | 0.76              | 0.98<br>(0.95-1.02)        | 0.30              |
| CR1 at time of allo-HCT1                               | 0.69<br>(0.35-1.38)        | 0.29              | 0.94<br>(0.68-1.29)        | 0.68              |
| URD vs. MRD at allo-HCT1                               | 0.77<br>(0.22-2.81)        | 0.70              | 0.68<br>(0.37-1.27)        | 0.22              |
| RIC vs. MAC at allo-HCT1                               | 0.86<br>(0.46-1.58)        | 0.62              | 1.13<br>(0.86-1.50)        | 0.38              |
| Grade 2-4 vs. none aGVHD prior to DLI/allo-HCT2        | <b>2.21</b><br>(1.14-4.30) | <b>0.02</b>       | <b>1.57</b><br>(1.09-2.26) | <b>0.02</b>       |
| cGVHD (all grades) vs. none prior to DLI/allo-HCT2     | 1.01<br>(0.56-1.82)        | 0.98              | <b>0.68</b><br>(0.50-0.93) | <b>0.02</b>       |
| Time from allo-HCT1 to relapse (months)                | 0.99<br>(0.98-1.01)        | 0.25              | <b>0.98</b><br>(0.98-0.99) | <b>&lt;0.0001</b> |
| Time from relapse to DLI/allo-HCT2 (months)            | 0.92<br>(0.78-1.08)        | 0.31              | 0.96<br>(0.90-1.03)        | 0.32              |
| Other donor vs. MRD at DLI/allo-HCT2                   | 1.60<br>(0.45-5.63)        | 0.47              | 1.53<br>(0.84-2.80)        | 0.17              |
| CR vs. no CR at DLI/allo-HCT2                          | 0.90<br>(0.48-1.69)        | 0.75              | <b>0.56</b><br>(0.42-0.76) | <b>0.0002</b>     |

**Bold denotes significant difference**

**Abbreviations:** NRM, non-relapse mortality; OS, overall survival; allo-HCT2, second allogeneic hematopoietic cell transplant; DLI, donor lymphocyte infusion; allo-HCT1, first allogeneic hematopoietic cell transplant; CR1, first complete remission; MRD, HLA-matched related donor; URD, unrelated donor; MAC, myeloablative conditioning regimen; RIC, reduced intensity conditioning regimen; aGVHD, acute graft-versus-host disease; cGVHD, chronic GVHD

**eFigure 1. OS (Allo-HCT2 vs. DLI), Patients in CR at Time of Intervention**

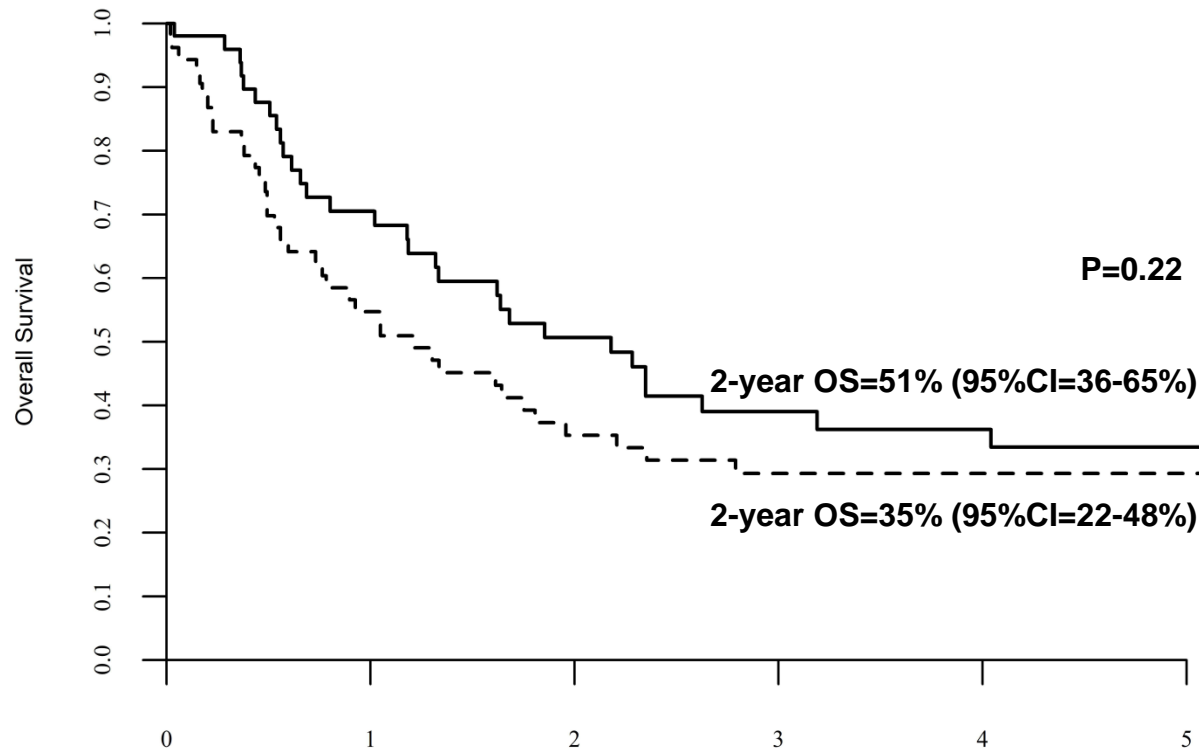

Time from transplant (years)

number of at-risk patients

|                 |    |    |    |    |    |    |
|-----------------|----|----|----|----|----|----|
| — DLI           | 51 | 32 | 23 | 14 | 13 | 11 |
| - - - Allo-HCT2 | 53 | 29 | 18 | 14 | 14 | 11 |

**eFigure 2.** LFS (Allo-HCT2 vs. DLI), Patients in CR at Time of Intervention

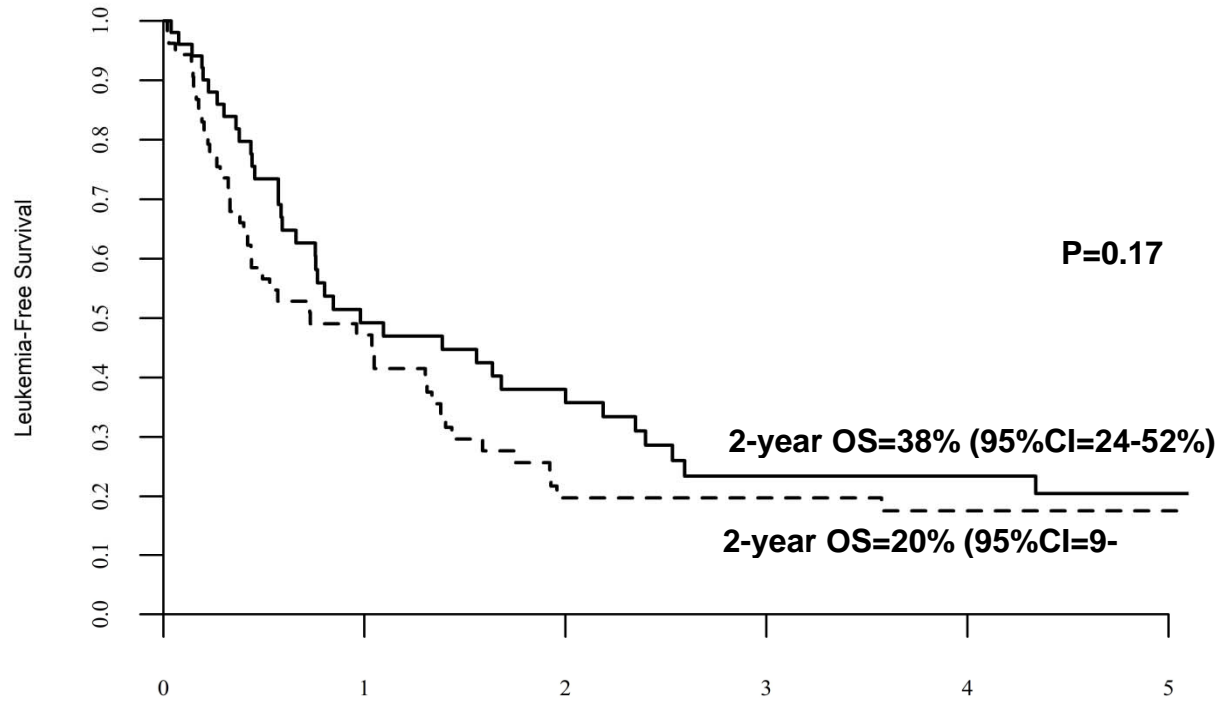

|                 | number of at-risk patients |    |    |   |   |   |  |
|-----------------|----------------------------|----|----|---|---|---|--|
|                 | 0                          | 1  | 2  | 3 | 4 | 5 |  |
| — DLI           | 51                         | 22 | 17 | 8 | 8 | 7 |  |
| - - - Allo-HCT2 | 53                         | 25 | 10 | 9 | 8 | 7 |  |
